# Supplementary material for: Bupivacaine inhibits the malignant biological behavior of oral squamous cell carcinoma cells by inhibiting the activation of ERK1/2 and STAT3
Source: PubMed Central journal article supplement — Ann Transl Med. 2021 May;9(10):839. doi: 10.21037/atm-21-1414 (PMC8184410; doi:10.21037/atm-21-1414), 2021-05
Supplement: atm-09-10-839-dss.pdf [file atm-09-10-839-dss.pdf]

## Data Sharing Statement

|                     |                                                                                                                                                     |                                                                                                                  |
|---------------------|-----------------------------------------------------------------------------------------------------------------------------------------------------|------------------------------------------------------------------------------------------------------------------|
| <b>Article Info</b> | <a href="http://dx.doi.org/10.21037/atm-21-1414">http://dx.doi.org/10.21037/atm-21-1414</a>                                                         |                                                                                                                  |
| <b>Item</b>         | <b>Question</b>                                                                                                                                     | <b>Authors' Response<br/>(place "-" if not applicable)</b>                                                       |
| 1                   | Would you like to share data collected for your study to others?                                                                                    | Yes.                                                                                                             |
| 2                   | If not, would you like to share the reason for your decision?                                                                                       | -                                                                                                                |
| 3                   | What data in particular will be shared?                                                                                                             | The cellular functions data in particular will be shared                                                         |
| 4                   | Any other documents will be shared? Such as study protocol, statistical analysis plan, informed consent form, clinical study report, analytic code. | Study protocol and statistical analysis plan will be shared if requested                                         |
| 5                   | When will data availability begin?                                                                                                                  | From the publication date.                                                                                       |
| 6                   | When will data availability end?                                                                                                                    | 1 years within the publication date, since the technique or survival date may be updated over time.              |
| 7                   | To whom will you share the data?                                                                                                                    | Medical and scientific researchers interested in oral squamous cell carcinoma.                                   |
| 8                   | For what type of analysis or purpose?                                                                                                               | An analysis used to fundamental research.                                                                        |
| 9                   | How or where can the data/documents be obtained?                                                                                                    | Emails could be sent to corresponding author fanliyuan_8356@163.com.                                             |
| 10                  | Any other restrictions?                                                                                                                             | We may balance the potential benefits and risks for each request and then provide the data that could be shared. |
